# Supplementary material for: Long-term ex situ normothermic perfusion of human split livers for more than 1 week
Source: PubMed Central journal article supplement (PMC10409852; doi:10.1038/s41467-023-40154-8), 2023-08-08
Supplement: 41467_2023_40154_MOESM1_ESM.pdf [file 41467_2023_40154_MOESM1_ESM.pdf]

**TITLE:**

Long-term ex-situ normothermic perfusion of human split livers for more than 1 week

**Supplementary Information****Supplementary Table 1: Liver characteristics, donor liver function tests and donation details**

CIT: cold ischaemic time, WCRS: withdrawal of cardiorespiratory support, WIT: warm ischaemic time

| <b>Liver number</b> | <b>Bilirubin (µmol/L)</b> | <b>AST (U/L)</b> | <b>ALT (U/L)</b> | <b>ALP (U/L)</b> | <b>GGT (U/L)</b> | <b>INR</b> | <b>Time to death (WCRS to cessation of circulation) (minutes)</b> | <b>CIT (minutes)</b> | <b>WIT (systolic blood pressure &lt;50 to cold flush) (minutes)</b> |
|---------------------|---------------------------|------------------|------------------|------------------|------------------|------------|-------------------------------------------------------------------|----------------------|---------------------------------------------------------------------|
| 1                   | 3                         | 63               | 63               | 42               | 32               | 1.1        | N/A                                                               | 238                  | N/A                                                                 |
| 2                   | 4                         | 56               | 43               | 70               | 150              | 1.1        | 19                                                                | 305                  | 20                                                                  |
| 3                   | 9                         | 19               | 21               | 71               | 65               | 1.4        | 31                                                                | 449                  | 29                                                                  |
| 4                   | 6                         | 40               | 50               | 70               | 68               | 1          | 21                                                                | 456                  | 22                                                                  |
| 5                   | 7                         | 110              | 30               | 88               | 38               | 1.4        | N/A                                                               | 187                  | N/A                                                                 |
| 6                   | 152                       | 95               | 241              | 246              | 333              | 2.1        | N/A                                                               | 430                  | N/A                                                                 |
| 7                   | 9                         | 146              | 187              | 82               | 51               | 1.1        | 36                                                                | 284                  | 19                                                                  |
| 8                   | 6                         | 53               | 25               | 228              | 308              | 1          | 19                                                                | 272                  | 29                                                                  |
| 9                   | 11                        | 51               | 46               | 68               | 108              | 1.5        | 17                                                                | 274                  | 14                                                                  |
| 10                  | 29                        | 49               | 51               | 117              | 79               | 2          | N/A                                                               | 397                  | N/A                                                                 |

**Supplementary Table 2: Perfusion details after long-term normothermic perfusion of partial human livers**

ERG: extended right graft, LLSG: left lateral segment graft

| Liver number | Whole Liver weight (g) | Partial liver | Weight after split (g) | Weight at end (g) | Maximum hepatocellular viability* (hours) | Liver survival (hours) |
|--------------|------------------------|---------------|------------------------|-------------------|-------------------------------------------|------------------------|
| 1            | 1862                   | LLSG          | 437                    | 438               | 22                                        | 159                    |
|              |                        | ERG           | 1501                   | 1445              | 21                                        | 39                     |
| 2            | 2188                   | LLSG          | 626                    | 595               | 171                                       | 209                    |
|              |                        | ERG           | 1514                   | 1440              | 210                                       | 228                    |
| 3            | 2407                   | LLSG          | 575                    | 477               | 87.5                                      | 107                    |
|              |                        | ERG           | 1771                   | 1470              | 262                                       | 288                    |
| 4            | 1279                   | LLSG          | 238                    | 252               | 88.5                                      | 108                    |
|              |                        | ERG           | 846                    | 895               | 139.5                                     | 167                    |
| 5            | 1615                   | LLSG          | 227                    | 353               | 125                                       | 181                    |
|              |                        | ERG           | 1210                   | 1302              | 125                                       | 163                    |
| 6            | 1500                   | LLSG          | 279                    | 362               | 82                                        | 96                     |
|              |                        | ERG           | 1113                   | 1413              | 66                                        | 79                     |
| 7            | 1343                   | LLSG          | 241                    | 313               | 90                                        | 114                    |
|              |                        | ERG           | 845                    | 902               | 115                                       | 123                    |
| 8            | 3633                   | LLSG          | 726                    | 738               | 105.5                                     | 150.5                  |
|              |                        | ERG           | 2455                   | 2439              | 160.5                                     | 177.5                  |
| 9            | 2497                   | LLSG          | 418                    | 623               | 165.5                                     | 327.5                  |
|              |                        | ERG           | 1522                   | 1719              | 295.5                                     | 327.5                  |
| 10           | 1461                   | LLSG          | 292                    | 457               | 201.5                                     | 257.5                  |
|              |                        | ERG           | 959                    | 1172              | 190.5                                     | 222.5                  |

\*Viability according to the criteria proposed by the VITTAL clinical trial ( $\leq 2.5$ mmol/L, and two or more of: bile production,  $\text{pH} \geq 7.30$ , glucose metabolism, hepatic arterial flow  $\geq 150$ ml/minute and portal vein flow  $\geq 500$ ml/minute, or homogeneous perfusion).<sup>1</sup>

**Supplementary Table 3: Assessment of hepatocellular and hepatobiliary viability of partial livers during normothermic machine perfusion**

ERG: extended right graft, LLSG: left lateral segment graft

| Liver number | Partial liver | Hepatocellular viability* duration and criteria causing failure | Overall survival duration and criteria causing failure                        | Hepatobiliary viability# duration and criteria causing failure, bile pH |
|--------------|---------------|-----------------------------------------------------------------|-------------------------------------------------------------------------------|-------------------------------------------------------------------------|
| 1            | LLSG          | 22 hours<br>Lactate 3.43                                        | 159<br>Lactate 12.83                                                          | 21.5 hours<br>Lactate 1.93<br>Bile pH Nil                               |
|              | ERG           | 21 hours<br>Lactate 15.08                                       | 39 hours<br>Lactate 13.3                                                      | 20.5 hours<br>Lactate 1.72<br>Bile pH Nil                               |
| 2            | LLSG          | 171 hours<br>Lactate 2.84                                       | 209 hours<br>Lactate 12.59                                                    | 100 hours<br>Lactate 2.54<br>Bile pH 7.795                              |
|              | ERG           | 210 hours<br>Lactate 5.18                                       | 228 hours<br>Lactate 19.08                                                    | 207 hours<br>Lactate 2.11<br>Bile pH 7.546                              |
| 3            | LLSG          | 87.5 hours<br>Lactate 2.97                                      | 107 hours<br>Lactate 11.67                                                    | 87.5 hours<br>Lactate 2.97<br>Bile pH 7.649                             |
|              | ERG           | 262 hours<br>Lactate 3.08                                       | 288 hours<br>Lactate 11.2                                                     | 163 hours<br>Lactate 1.82<br>Bile pH 7.478                              |
| 4            | LLSG          | 88.5 hours<br>Lactate 2.50                                      | 108 hours<br>Lactate 11.98                                                    | 79.5 hours<br>Lactate 1.79<br>Bile pH 7.6                               |
|              | ERG           | 139.5 hours<br>Lactate 2.84                                     | 167 hours<br>Lactate 3.78<br>pH 6.90, glucose <2                              | 132.5 hours<br>Lactate 2.08<br>Bile pH 7.412                            |
| 5            | LLSG          | 125 hours<br>Lactate 3.75                                       | 181 hours<br>Lactate 14.89                                                    | 110 hours<br>Lactate 1.76<br>Bile pH 7.662                              |
|              | ERG           | 125 hours<br>Lactate 3.95                                       | 163 hours<br>Lactate 14.98                                                    | 123 hours<br>Lactate 2.31<br>Bile pH 7.658                              |
| 6            | LLSG          | 82 hours<br>Lactate 4.47                                        | 96 hours<br>Lactate 0.57<br>pH 7.127, glucose 1.9                             | 82 hours<br>Lactate 4.47<br>Bile pH 7.493                               |
|              | ERG           | 66 hours<br>Lactate 2.96                                        | 79 hours<br>Lactate 6.69<br>Arterial flow 80ml/min, non-homogeneous perfusion | 60 hours<br>Lactate 2.3<br>Bile pH 7.786                                |
| 7@           | LLSG          | 90 hours<br>Lactate 2.89                                        | 114 hours<br>Lactate 11.87                                                    | 82 hours<br>Lactate 2.22<br>Bile pH N/A (clamped)                       |
|              | ERG           | 115 hours<br>Lactate 3.1                                        | 123 hours<br>Lactate 19.64                                                    | 107 hours<br>Lactate 2.0<br>Bile pH N/A (clamped)                       |

|    |      |                             |                                                                   |                                              |
|----|------|-----------------------------|-------------------------------------------------------------------|----------------------------------------------|
| 8  | LLSG | 105.5 hours<br>Lactate 2.54 | 150.5 hours<br>Lactate 19.8                                       | 94.5 hours<br>Lactate 2.77<br>Bile pH 7.48   |
|    | ERG  | 160.5 hours<br>Lactate 2.98 | 177.5 hours<br>Lactate 13.07                                      | 156.5 hours<br>Lactate 2.21<br>Bile pH 7.419 |
| 9  | LLSG | 165.5 hours<br>Lactate 2.93 | 327.5 hours<br>Lactate 13.31                                      | 101.5 hours<br>Lactate 1.81<br>Bile pH 7.445 |
|    | ERG  | 295.5 hours<br>Lactate 3.61 | 327.5 hours<br>Lactate 16.98                                      | 295.5 hours<br>Lactate 3.61<br>Bile pH 7.778 |
| 10 | LLSG | 201.5 hours<br>Lactate 3.56 | 257.5 hours<br>Lactate 0.84<br>pH low, arterial flow<br>109ml/min | 112.5 hours<br>Lactate 1.9<br>Bile pH 7.761  |
|    | ERG  | 190.5 hours<br>Lactate 2.61 | 222.5 hours<br>Lactate 10.07                                      | 188.5 hours<br>Lactate 1.72<br>Bile pH 7.541 |

\*Hepatocellular viability according to the criteria proposed by the VITTAL clinical trial ( $\leq 2.5$ mmol/L, and two or more of: bile production,  $\text{pH} \geq 7.30$ , glucose metabolism, hepatic arterial flow  $\geq 150$ ml/minute and portal vein flow  $\geq 500$ ml/minute, or homogeneous perfusion).<sup>1</sup>

#Hepatobiliary viability according to the criteria used in the DHOPE-COR-NMP clinical trial (lactate  $< 1.7$ mmol/L,  $\text{pH} 7.35-7.45$ , bile production  $> 10$ ml and bile  $\text{pH} > 7.45$ ).<sup>2</sup>

@ No bile pH measured for Liver 7 due to haemobilia requiring clamping of the bile duct.

### Supplementary Table 4: Donor characteristics and liver survival

DCD: donation after circulatory determination of death

| <b>Donor characteristic</b>             | <b>Liver survival<br/>≤7 days (n=11)</b> | <b>Liver survival<br/>&gt;7 days (n=9)</b> | <b>p-value</b> |
|-----------------------------------------|------------------------------------------|--------------------------------------------|----------------|
| Male sex                                | 7/11                                     | 7/9                                        | p=0.642        |
| Age (mean ± standard deviation)         | 53.55 ±15.38                             | 52.78 ±13.33                               | p=0.908        |
| DCD                                     | 6/11                                     | 6/9                                        | p=0.670        |
| Donor BMI (median, 25%-75% percentiles) | 29.0 (23.5-43.6)                         | 25.2 (22.8-30.7)                           | p=0.293        |

**Supplementary Figure 1: Long-term normothermic machine perfusion of human whole livers.**

(A) Perfusate lactate levels during perfusion demonstrating rapid clearance followed by maintenance of low lactate levels until the point of organ failure. (B) Overall survival times demonstrating that all livers (3/3) survived >7 days.

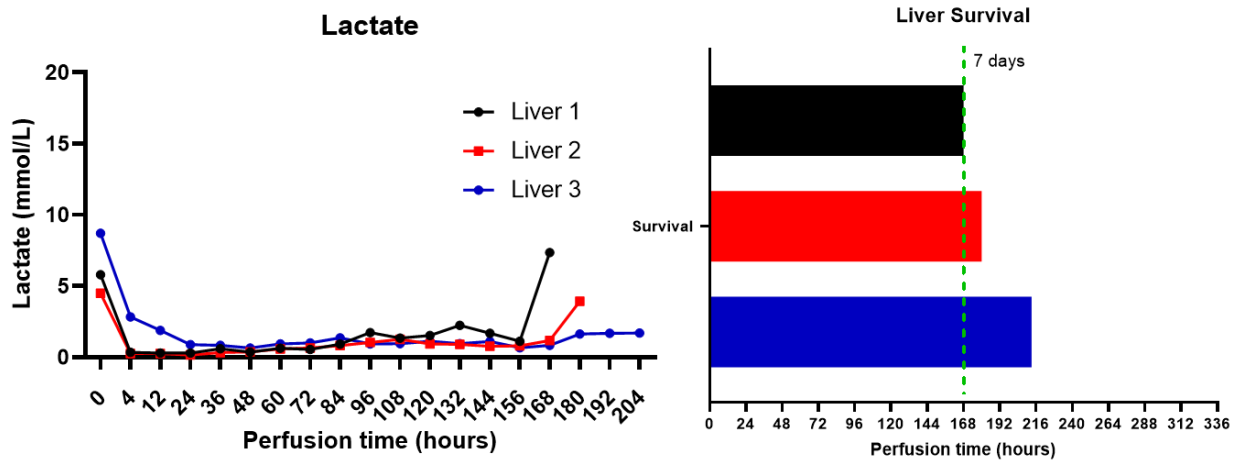

## Supplementary Figure 2: Additional biochemical and functional evidence of long-term graft function of human split livers.

Typically, bilirubin (A), and GGT (B) levels in the perfusate remained low during perfusion but gradually increased during perfusion towards the point of graft failure. Urea (C) levels remained consistent throughout perfusion. Prothrombin time (D) shortened as liver synthetic function improved after reperfusion and then lengthened as liver function deteriorated towards the end of perfusion. Albumin (E), total protein (F) and ALP (G) levels remained steady during perfusion. Perfusate levels of ALT peaked in the first 48-72 hours after whole liver reperfusion before plateauing then decreasing during long-term perfusion (H).

ALP: alkaline phosphatase, ALT: alanine amino-transferase, GGT: Gamma-glutamyl transferase

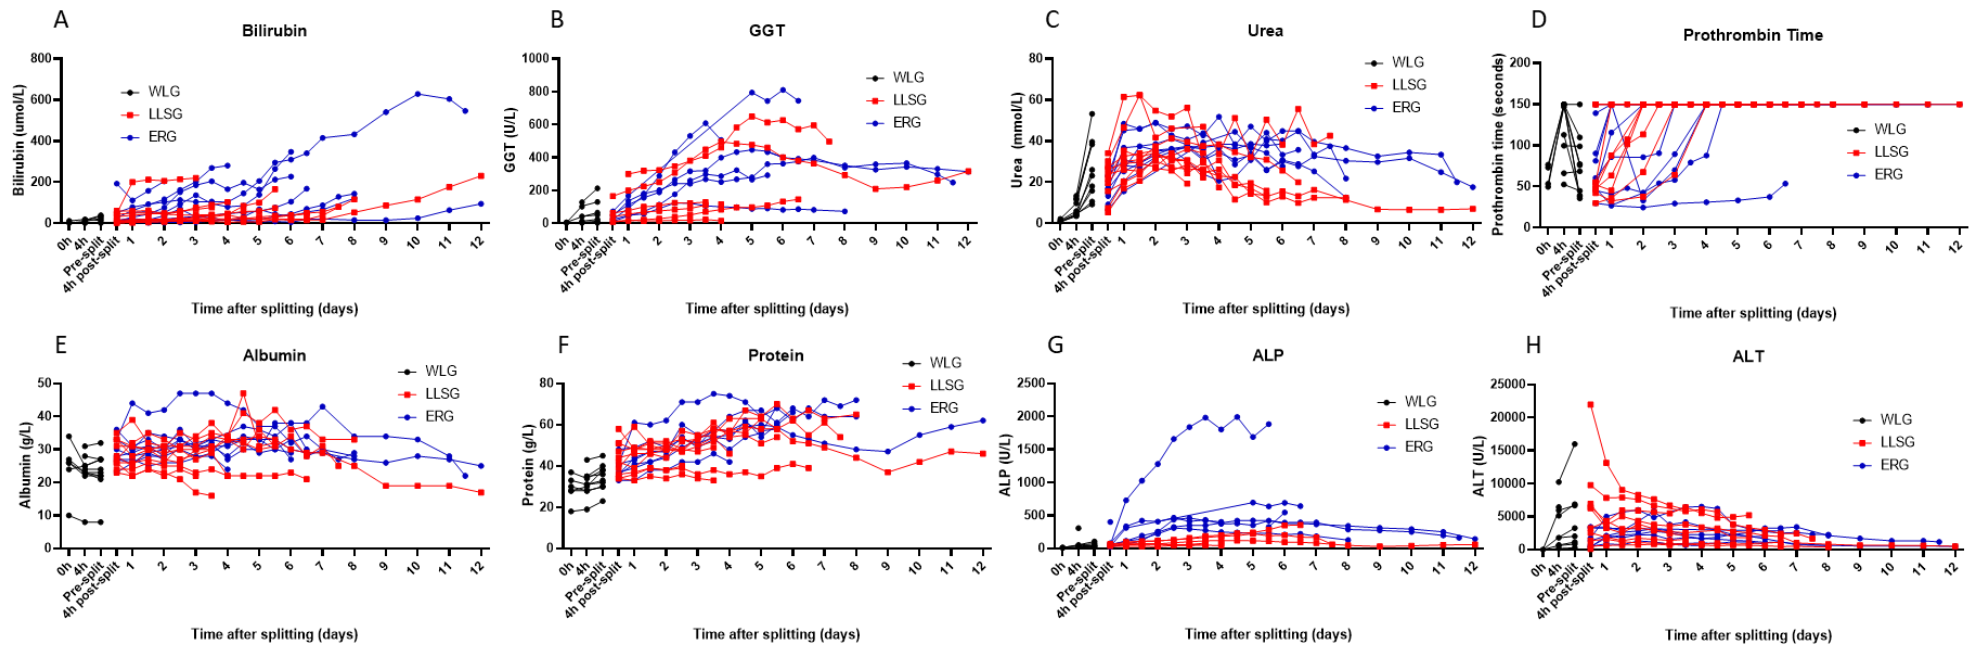

**Supplementary Figure 3: Histopathology analysis of bile duct biopsies taken during long-term perfusion of human split livers.**

Slides were stained with haematoxylin and eosin to assess biliary architecture and integrity. Mural stromal necrosis was present (A, 9 days after splitting), however intact biliary epithelium was seen in 80% of livers (B, 3 days after splitting) suggesting preserved biliary tree integrity. Star marks mural stromal necrosis and arrows mark intact epithelium.

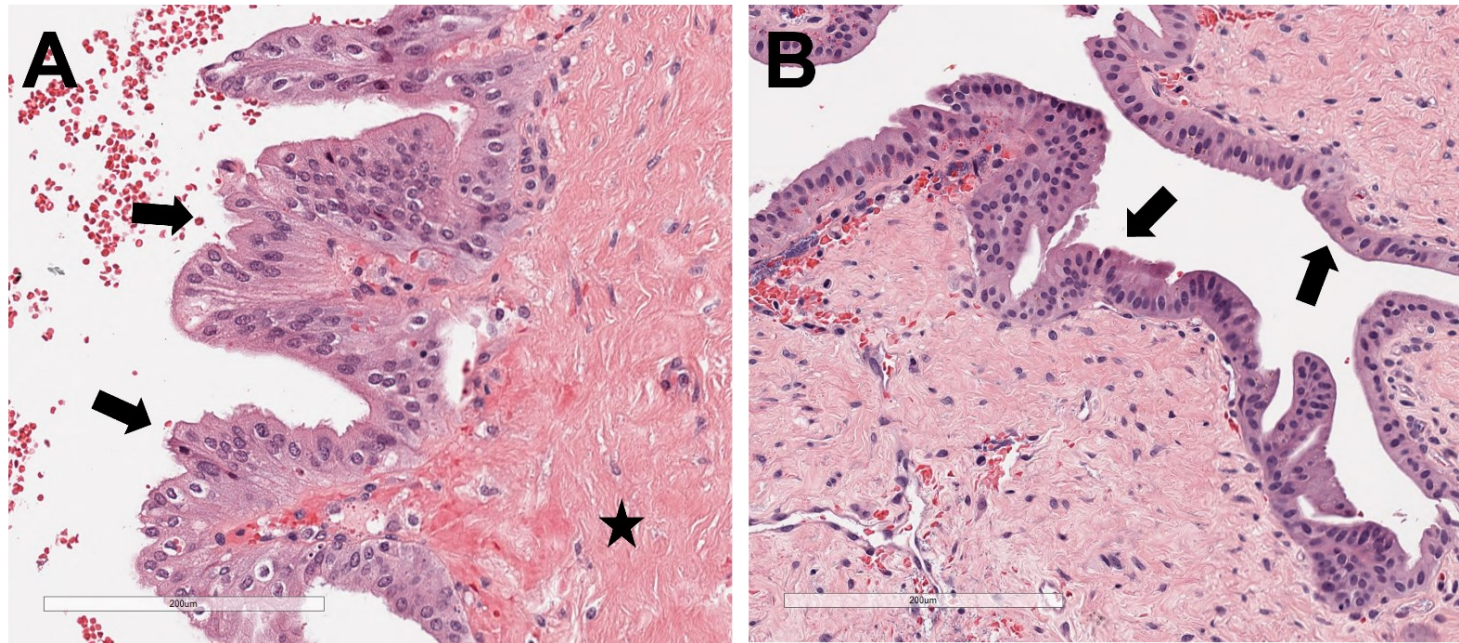



### Supplementary Figure 4. Additional factors related to long-term survival of human split livers.

Perfusate bilirubin (A), GGT (B), protein (C), albumin (D), ALP (E), and ALT (F) did not demonstrate significant differences between livers that survived >7 days or ≤7 days. After adjustment for liver weight, hepatic artery flow and portal vein flow demonstrated a less pronounced difference between livers that survived >7 days or ≤7 days (G-H). Hepatic artery flow was significantly higher at 4h in livers that survived >7 days (median 256ml/min [IQR: 228-367ml/min] vs 227ml/min [IQR: 166-238ml/min],  $p=0.019$ , Mann-Whitney U Test). All grouped data are presented as median (IQR) except for GGT and ALT which were normally distributed and presented as mean (standard deviation),  $n=20$  partial livers, 9 survived >7 days, 11 survived ≤7 days,  $*p<0.05$ .

ALP: alkaline phosphatase, ALT: alanine amino-transferase, GGT: Gamma-glutamyl transferase, IQR: interquartile range

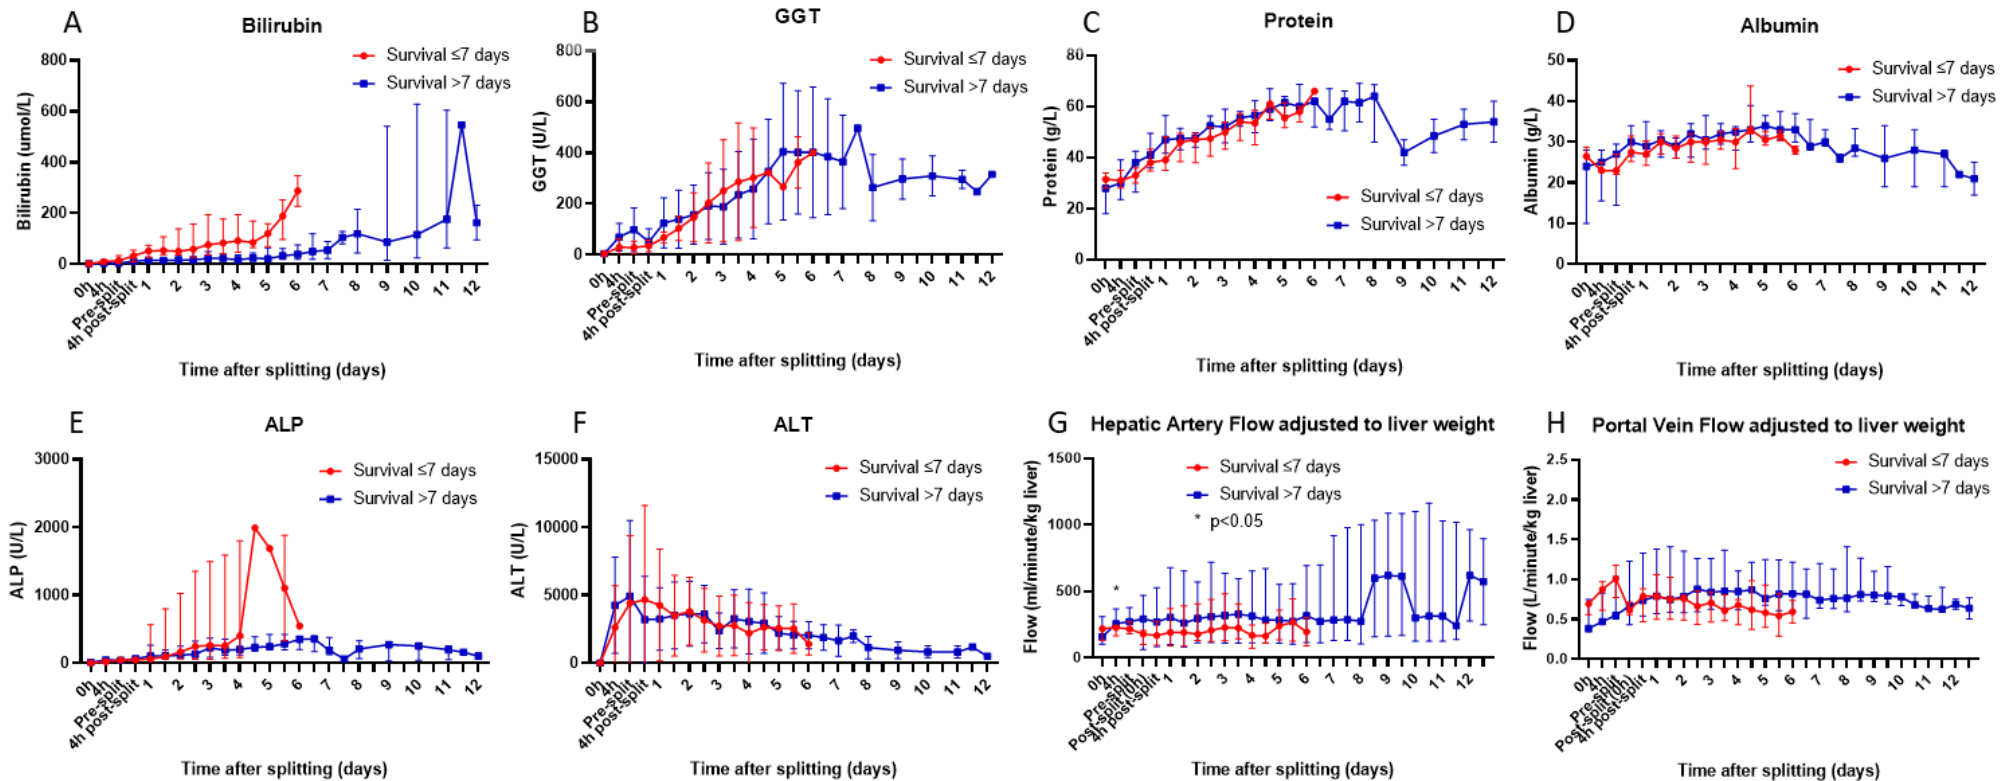

## Supplementary Figure 5. Algorithm to guide modification of parameters and maintenance of normothermic machine perfusion

|             |               |                                                                                                       |
|-------------|---------------|-------------------------------------------------------------------------------------------------------|
| PO2         | <150mmHg      | Increase arterial FiO2 (air O2 mixer) by 2-3%                                                         |
|             | 150-180mmHg   | No action                                                                                             |
|             | >190mmHg      | Decrease FiO2 (air O2 mixer) by 2-3%                                                                  |
| Potassium   | >5.5mmol/L    | Increase dialysis inflow by 50ml/h AND dialysis outflow by 50ml/h                                     |
|             | 4.5-5.5mmol/L | No action                                                                                             |
|             | 3-4.5mmol/L   | Decrease dialysis inflow by 50ml/h AND dialysis outflow by 50ml/h                                     |
| Haemoglobin | <50g/L        | Increase dialysis outflow by 20ml/h                                                                   |
|             | 50-60g/L      | No action                                                                                             |
|             | >60g/L        | Check reservoir volume. If low, decrease dialysis outflow by 20ml/h                                   |
| pH          | >7.3          | If pCO2 high, increase arterial ventilation by 0.05ml/min<br>If HCO3 low, increase dialysis by 20ml/h |
|             | 7.3-7.45      | No action                                                                                             |
|             | >7.45         | If pCO2 low, decrease arterial ventilation by 0.05ml/min<br>If HCO3 high, decrease dialysis by 20ml/h |
| Glucose     | <10mmol/L     | Increase glucose infusion by 3ml/h<br>Increase glucagon by 1ml/h<br>Decrease insulin by 1ml/h         |
|             | 10-15mmol/L   | No action                                                                                             |
|             | >15mmol/L     | Decrease glucose infusion by 3ml/h<br>Decrease glucagon by 1ml/h<br>Increase insulin by 1ml/h         |

## **Supplementary Notes 1: Methods for determination of hepatic tissue adenosine triphosphate and glycogen.**

Hepatic tissue adenosine triphosphate (ATP) content was determined using the ATP Bioluminescent Kit (FLAA Sigma-Aldrich) according to the manufacturer's instructions. Frozen core biopsies were homogenised and sonicated on ice in 100uL of SONOP Buffer (0.372g EDTA in 130ml dH<sub>2</sub>O, adjusted to pH 10.9 with NaOH with ethanol) and centrifuged at 13000g to remove particulates. ATP concentration was calculated using luminosity according to the standards in the manufacturer's instructions. This was corrected for protein concentration which was determined using the BCA Protein Assay Kit (ThermoFisher Scientific) and results expressed as  $\mu\text{mol/g}$  protein.

Hepatic tissue glycogen was determined using the Glycogen Assay Kit (MAK016, Sigma-Aldrich) according to the manufacturer's instructions. Frozen core biopsies were homogenised and sonicated on ice in 100 $\mu\text{l}$  H<sub>2</sub>O before being centrifuged at 13000g to remove particulates. The glycogen concentration was measured according to the manufacturer's instructions and the results were expressed as  $\mu\text{g}/\mu\text{g}$  of tissue.

## Supplementary References:

- 1 Mergental, H. *et al.* Transplantation of discarded livers following viability testing with normothermic machine perfusion. *Nature communications* **11**, 2939, (2020).
- 2 van Leeuwen, O. B. *et al.* Transplantation of High-risk Donor Livers After Ex Situ Resuscitation and Assessment Using Combined Hypo- and Normothermic Machine Perfusion: A Prospective Clinical Trial. *Ann Surg* **270**, 906-914, (2019).
